# Supplementary material for: In situ confined synthesis of an interlayer-riveted carbon shell encapsulated PdZnBi alloy as a highly active and durable oxygen reduction reaction catalyst
Source: Royal Society of Chemistry journal article supplement (doi:10.1039/d3ta07060c), 2024-01-01
Supplement: d3ta07060c1.pdf [file d3ta07060c1.pdf]

## Supporting Information

### In situ confined synthesis of interlayer-riveted carbon shell encapsulated PdZnBi alloy as highly active and durable oxygen reduction reaction catalyst

LiYuan Chang<sup>a</sup>, KaiLing Zhou<sup>a</sup>, WeiHan Si<sup>a</sup>, Chao Wang<sup>a</sup>, ChangHao Wang<sup>\*a</sup>, ManChen Zhang<sup>b</sup>,  
XiaoXing Ke<sup>b</sup>, Ge Chen<sup>\*c</sup> and RuZhi Wang<sup>\*a</sup>

Email address: [wrz@bjut.edu.cn](mailto:wrz@bjut.edu.cn); [chengge@bjut.edu.cn](mailto:chengge@bjut.edu.cn); [wangch33@bjut.edu.cn](mailto:wangch33@bjut.edu.cn)

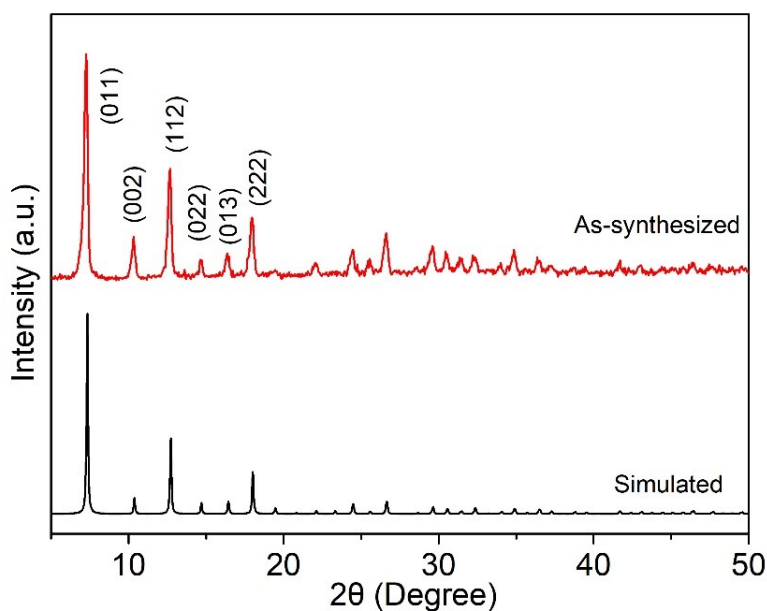

Fig. S1. XRD spectra of synthetic ZIF-8

\* Corresponding author. Email address: [wrz@bjut.edu.cn](mailto:wrz@bjut.edu.cn); [chengge@bjut.edu.cn](mailto:chengge@bjut.edu.cn); [wangch33@bjut.edu.cn](mailto:wangch33@bjut.edu.cn)

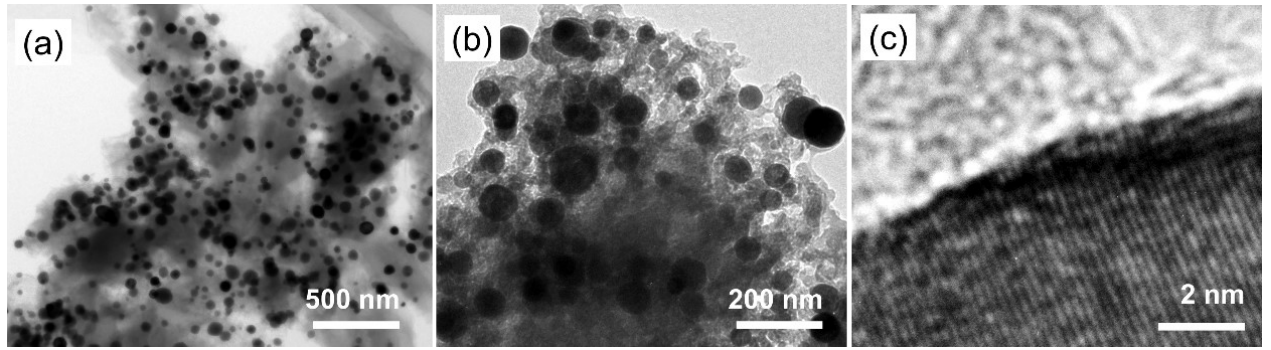

Fig. S2. TEM images of PdZnBi/NC-SL at different magnification

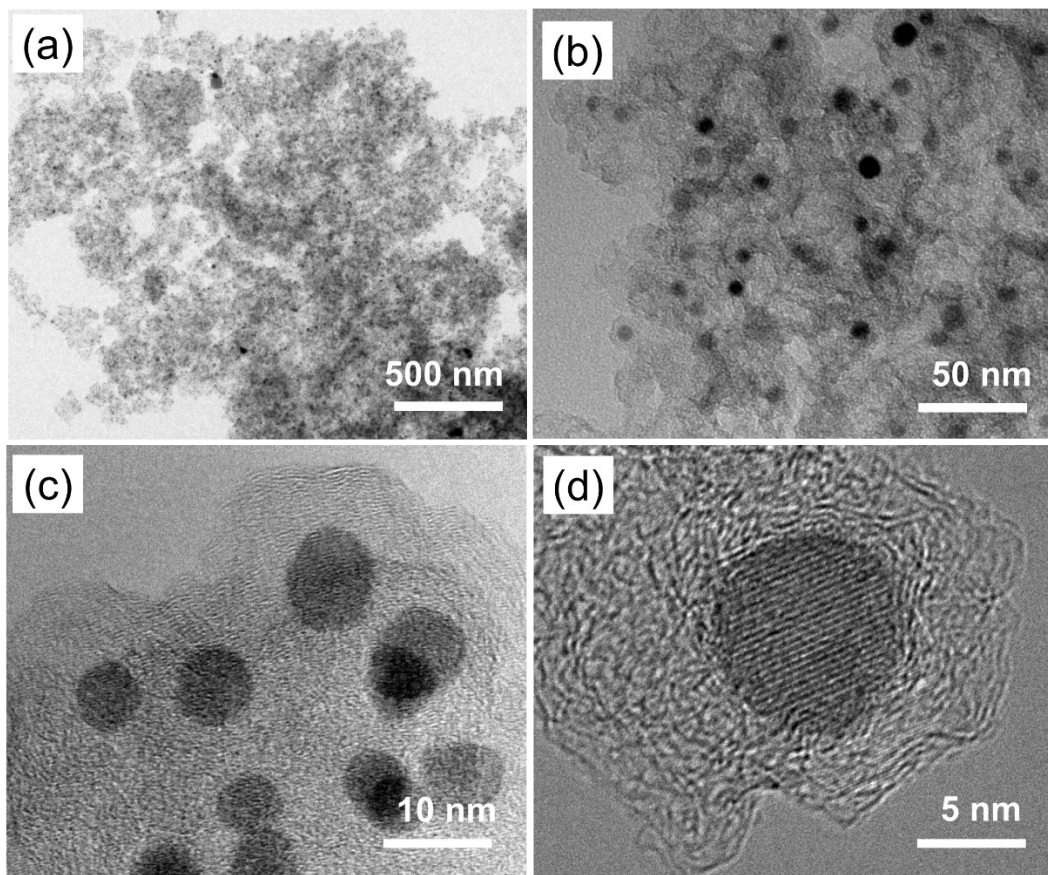

Fig. S3. PdZnBi/NC-IR TEM images with different magnifications

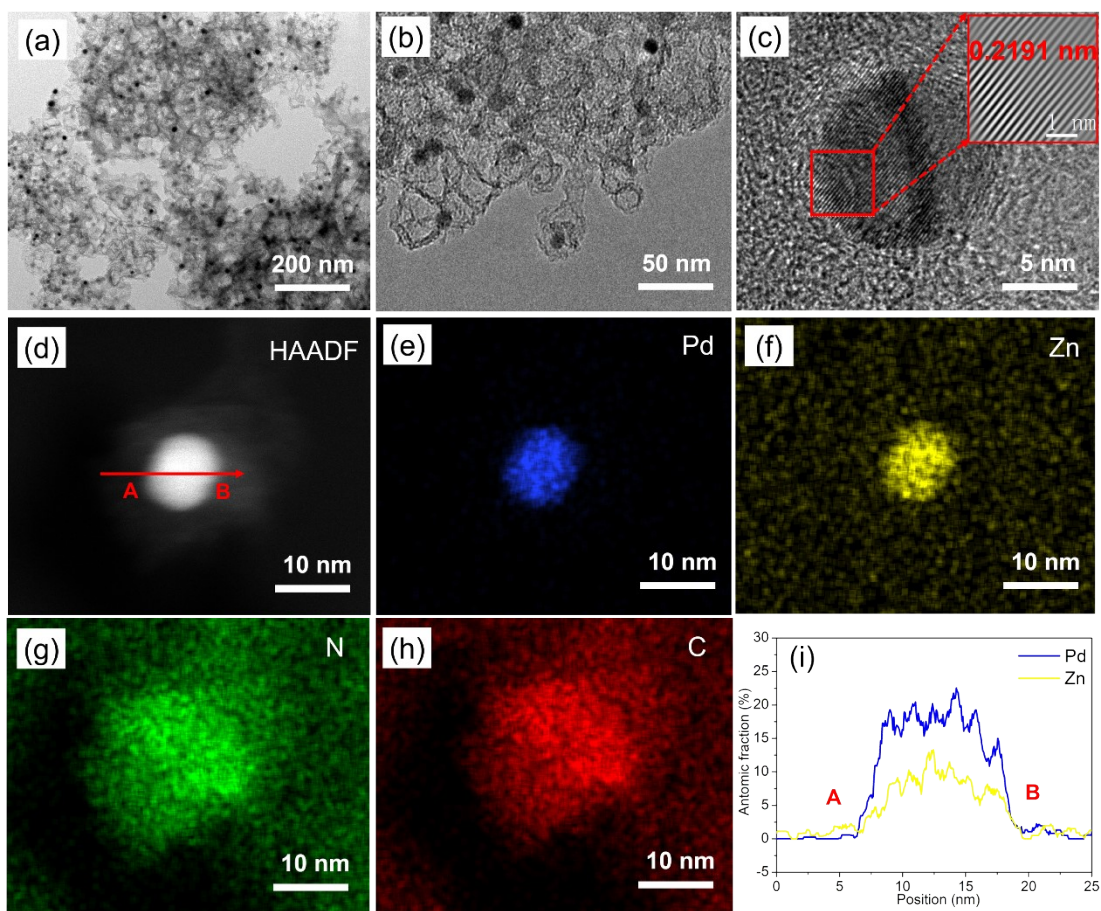

Fig. S4. (a~c) TEM images of PdZn/NC-IR at different magnification; (d) HAADF-STEM image of PdZn/NC-IR; (e~h) Elemental mappings of PdZn/NC-IR; (i) Line scan corresponding to the red arrow in Fig. (d).

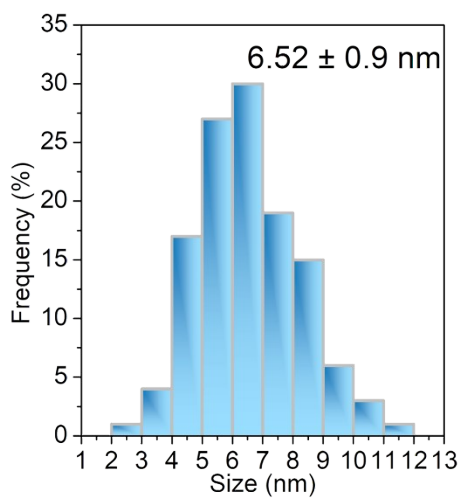

Fig. S5. Particle size distribution of PdZn/NC-IR;

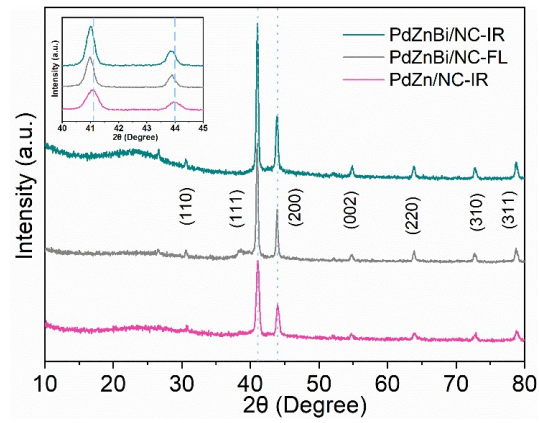

Fig. S6. XRD pattern of PdZnBi/NC-SL, PdZn/NC-IR and PdZnBi/NC-IR and Local enlargement

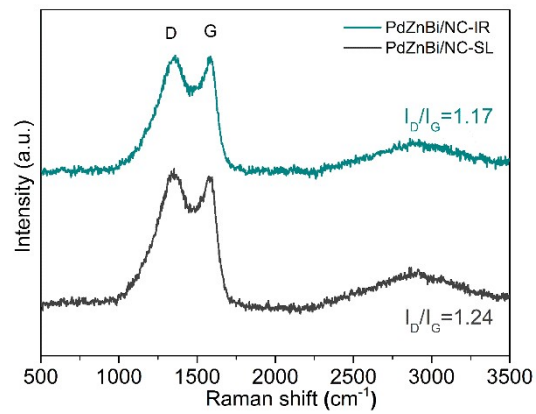

Fig. S7. Raman curve of PdZnBi/NC-IR and PdZnBi/NC-SL

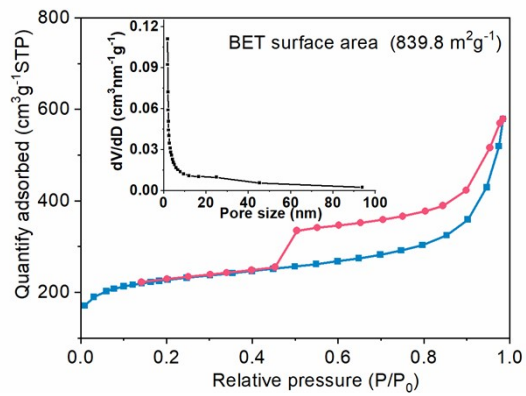

Fig. S8. N<sub>2</sub> adsorption-desorption isotherms of PdZnBi/NC-IR, the inset showing the corresponding pore size distribution



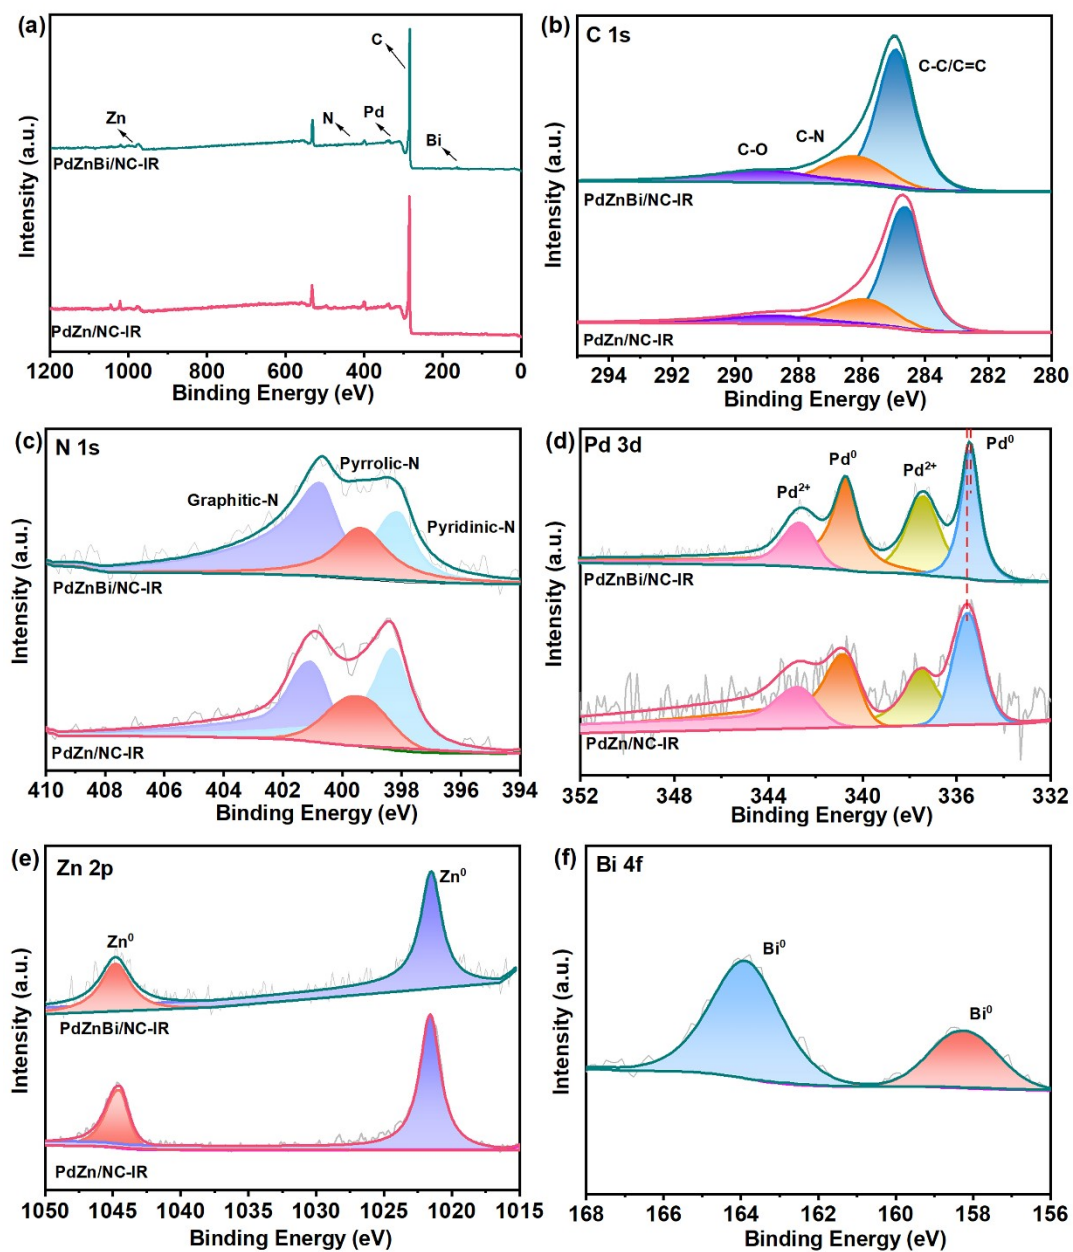

Fig. S9. XPS spectra of PdZn/NC-IR and PdZnBi/NC-IR. (a) Full survey spectra and deconvoluted (b) Pd 3d (c) N 1s, (d) C 1s, (e) Zn 2p and (f) Bi 4f spectra.

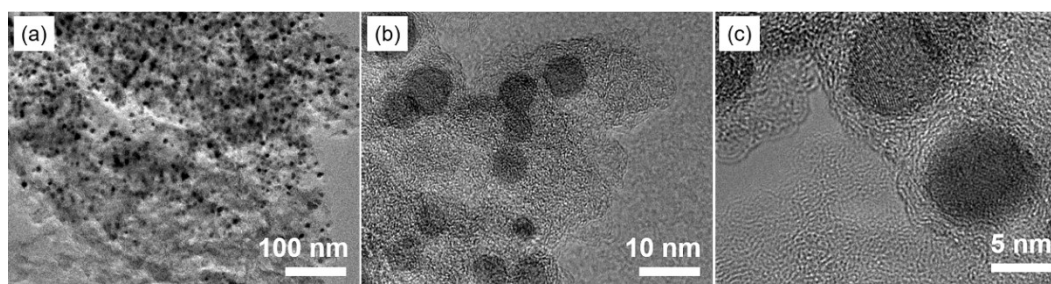

Fig. S10. PdZn alloy synthesized by sodium acetate as an additive.

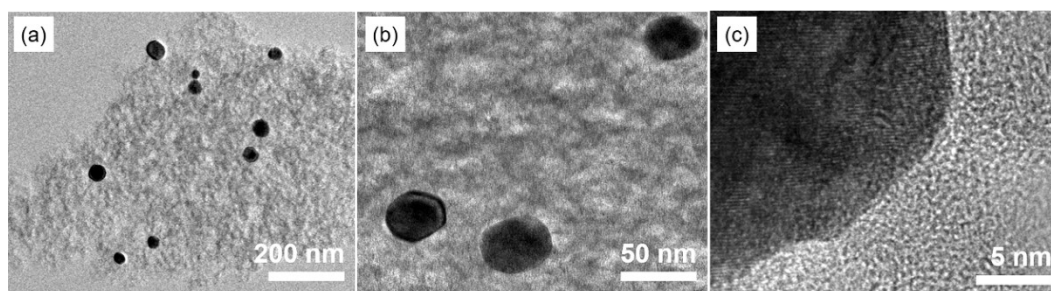

Fig. S11. PdZn alloy synthesized by glucose as an additive.

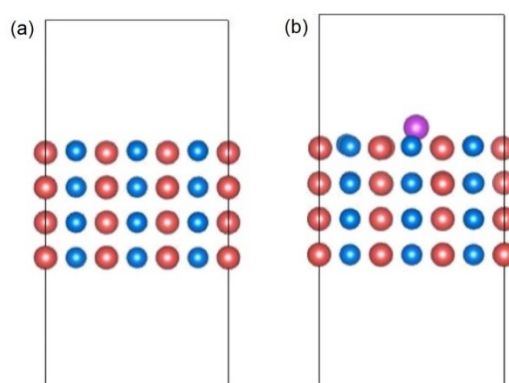

Fig. S12. (a) PdZn (111) and (b) PdZnBi (111). The red sphere represents the Pd atom, the blue sphere represents the Zn atom, and the purple sphere represents the Bi atomic table.

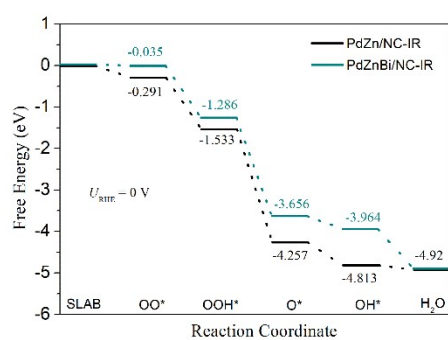

Fig. S13. Free energy diagrams of ORR on PdZn/NC-IR and PdZnBi/NC-IR at 0 V.

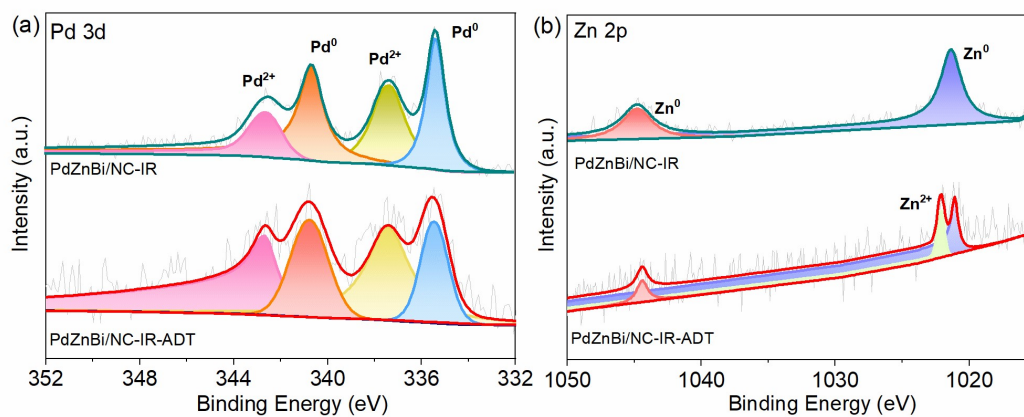

Fig. S14. XPS spectra of PdZnBi/NC-IR catalyst before and after stability test: (a) Pd 3d, (b) Zn 2p

Table S1. Elemental content in PdZnBi/NC-IR

| Elemental | Values (ppm) |
|-----------|--------------|
| Pd        | 5.068        |
| Zn        | 5.591        |
| Bi        | 0.634        |

Table S2. Elemental content in PdZn/NC-IR

| Elemental | Values (ppm) |
|-----------|--------------|
| Pd        | 5.235        |
| Zn        | 5.712        |

Table S3. Elemental content in PdZnBi/NC-SL

| Elemental | Values (ppm) |
|-----------|--------------|
| Pd        | 5.149        |
| Zn        | 5.683        |
| Bi        | 0.705        |

Table S4. Performance of samples

| samples      | $E_{1/2}$ (V) | MA ( $A\ mg^{-2}$ ) | SA ( $mA\ cm^{-2}$ ) |
|--------------|---------------|---------------------|----------------------|
| Pt/C         | 0.862         | 0.087               | 0.13                 |
| Pd/C         | 0.813         | 0.07                | 0.34                 |
| PdZnBi/NC-SL | 0.808         | 0.10                | 0.14                 |
| PdZn/NC-IR   | 0.883         | 0.78                | 0.71                 |
| PdZnBi/NC-IR | 0.892         | 1.05                | 0.73                 |

Table S5. Bard charge of four atoms around Bi in PdZnBi/NC-IR

| Atom | Charge (e) | Transferred charge (e) |
|------|------------|------------------------|
| Bi   | 4.6588     | -0.3412                |
| 1-Pd | 10.4170    | +0.4170                |
| 2-Pd | 10.4170    | +0.4170                |
| 3-Pd | 10.4012    | +0.4012                |
| 4-Pd | 10.4012    | +0.4012                |



Table S6. Comparison of stability

| <b>Catalyst</b>                                          | <b>Number of cycles (k)</b> | <b>Mass activity retention rate (%)</b> | <b>Ref.</b> |
|----------------------------------------------------------|-----------------------------|-----------------------------------------|-------------|
| Pd/p-BNO                                                 | 5                           | 93.9                                    | [48]        |
| Pd <sub>3</sub> Bi                                       | 10                          | 71                                      | [14]        |
| Pt/TiO <sub>2</sub> -C                                   | 10                          | 71.2                                    | [49]        |
| Pd <sub>5</sub> Bi <sub>2</sub> /C                       | 10                          | 74                                      | [50]        |
| FePt@PtBi                                                | 10                          | 82                                      | [51]        |
| PtCo/C                                                   | 10                          | 87                                      | [52]        |
| Pd-N-C                                                   | 10                          | 90                                      | [53]        |
| Pd <sub>17</sub> Se <sub>15</sub> NPs/C                  | 15                          | 55.5                                    | [54]        |
| Pd <sub>59</sub> Cu <sub>30</sub> Co <sub>11</sub>       | 15                          | 68.4                                    | [55]        |
| Pd/NRGO                                                  | 15                          | 72                                      | [56]        |
| Pt <sub>3</sub> Co <sub>0.6</sub> Ti <sub>0.4</sub> /DMC | 15                          | 78.5                                    | [57]        |
| HD-PdZn                                                  | 20                          | 79.9                                    | [58]        |
| PtCuAu <sub>0.0005</sub> /C                              | 20                          | 83                                      | [59]        |
| PdMo bimetallic                                          | 30                          | 72                                      | [13]        |
| PtCo-PtSn/C                                              | 30                          | 72.6                                    | [60]        |
| Au-O-PdZn                                                | 30                          | 90.5                                    | [17]        |
| nt-PtNiN/KB                                              | 30                          | 72.7                                    | [61]        |
| Pt <sub>78</sub> Zn <sub>22</sub>                        | 30                          | 85                                      | [62]        |
| Pt <sub>2</sub> CuW <sub>0.25</sub> /C                   | 30                          | 90.9                                    | [63]        |
| Pt <sub>3</sub> Co@Pt-SAC                                | 50                          | 90                                      | [64]        |
| This work                                                | 60                          | 84                                      | -           |
